# Supplementary material
Source: publisher figshare collection journal article supplement (https://diabetesjournals.figshare.com/articles/dataset/_/13014374)
Supplement: Supplementary file 1 [file 1]

**Six-months of hybrid closed-loop versus manual insulin delivery with finger-prick blood glucose monitoring in adults with type 1 diabetes: a randomized, controlled trial**

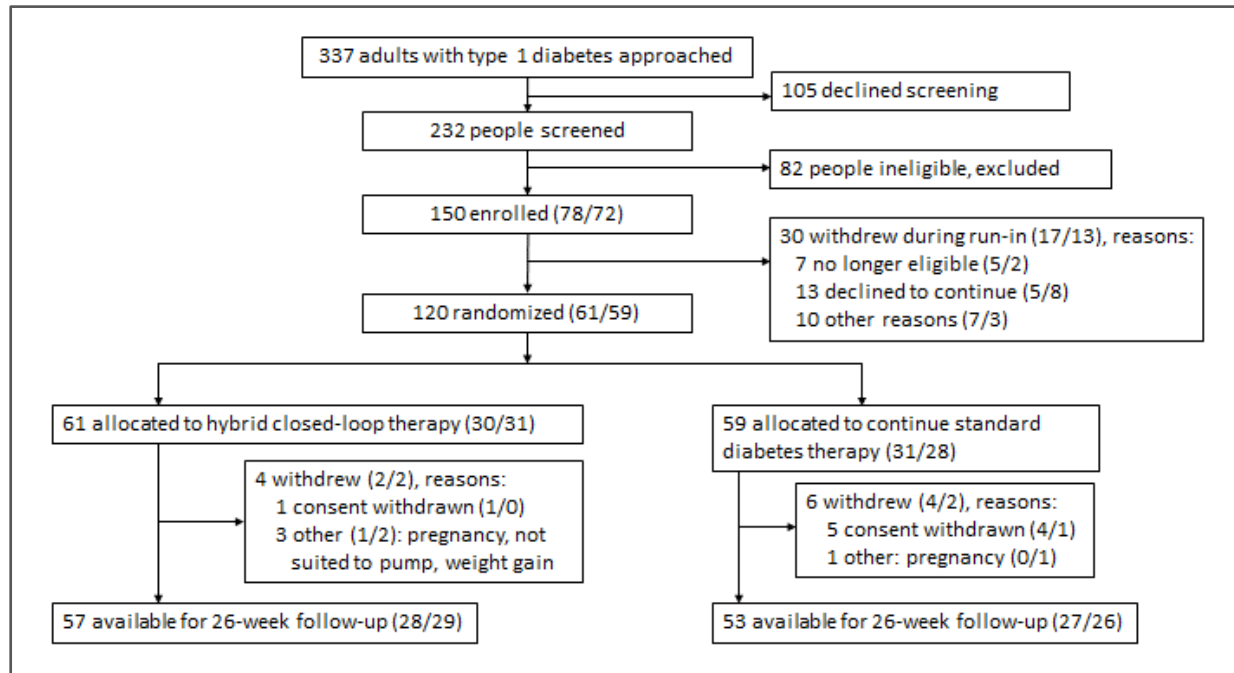

**Figure S1: Trial profile.** Overall numbers (baseline insulin delivery via multiple daily injections / pump).

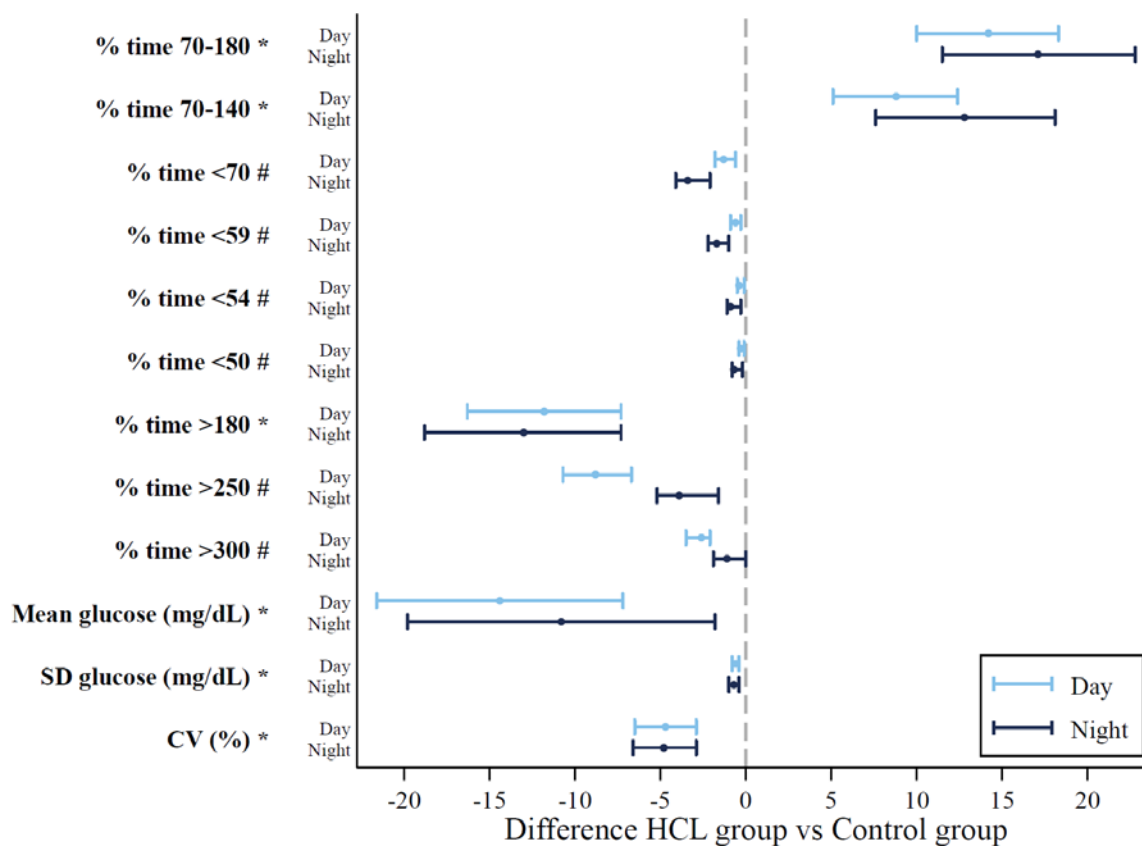

**Figure S2: Sub-group analysis by Day (6am–midnight) vs Night (midnight–6am).** Forest plot of differences in sensor glucose metrics at study-end between participants assigned to hybrid closed-loop (HCL) intervention versus control, presented by time of day (Day, light blue; Night, navy). Glucose levels are expressed in mg/dL. \* Lines represent mean difference with adjustment for baseline values (95% CI). # Lines represent median difference (95% CI).

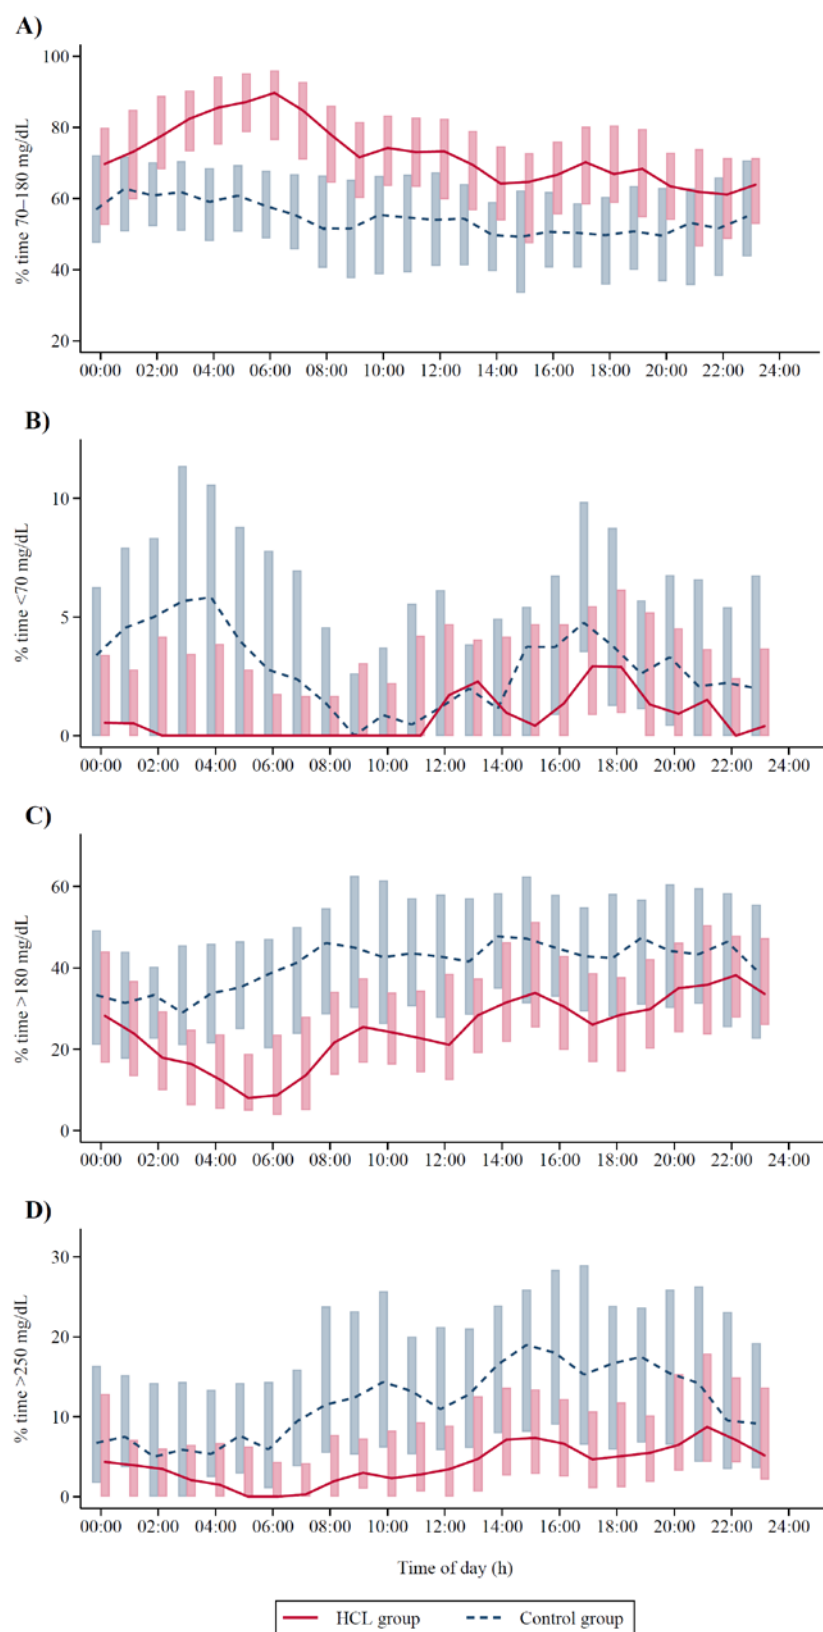

**Figure S3: Proportion of continuous glucose monitoring time: in range 70–180 mg/dL (Panel A), below 70 mg/dL (Panel B), above 180 mg/dL (Panel C), and above 250 mg/dL (Panel D).** The time is shown in hourly blocks, by allocated group (hybrid closed-loop [HCL] group, red; control group, blue). Lines represent the medians, and the bottom and top of each box represent the 25<sup>th</sup> and 75<sup>th</sup> percentiles.

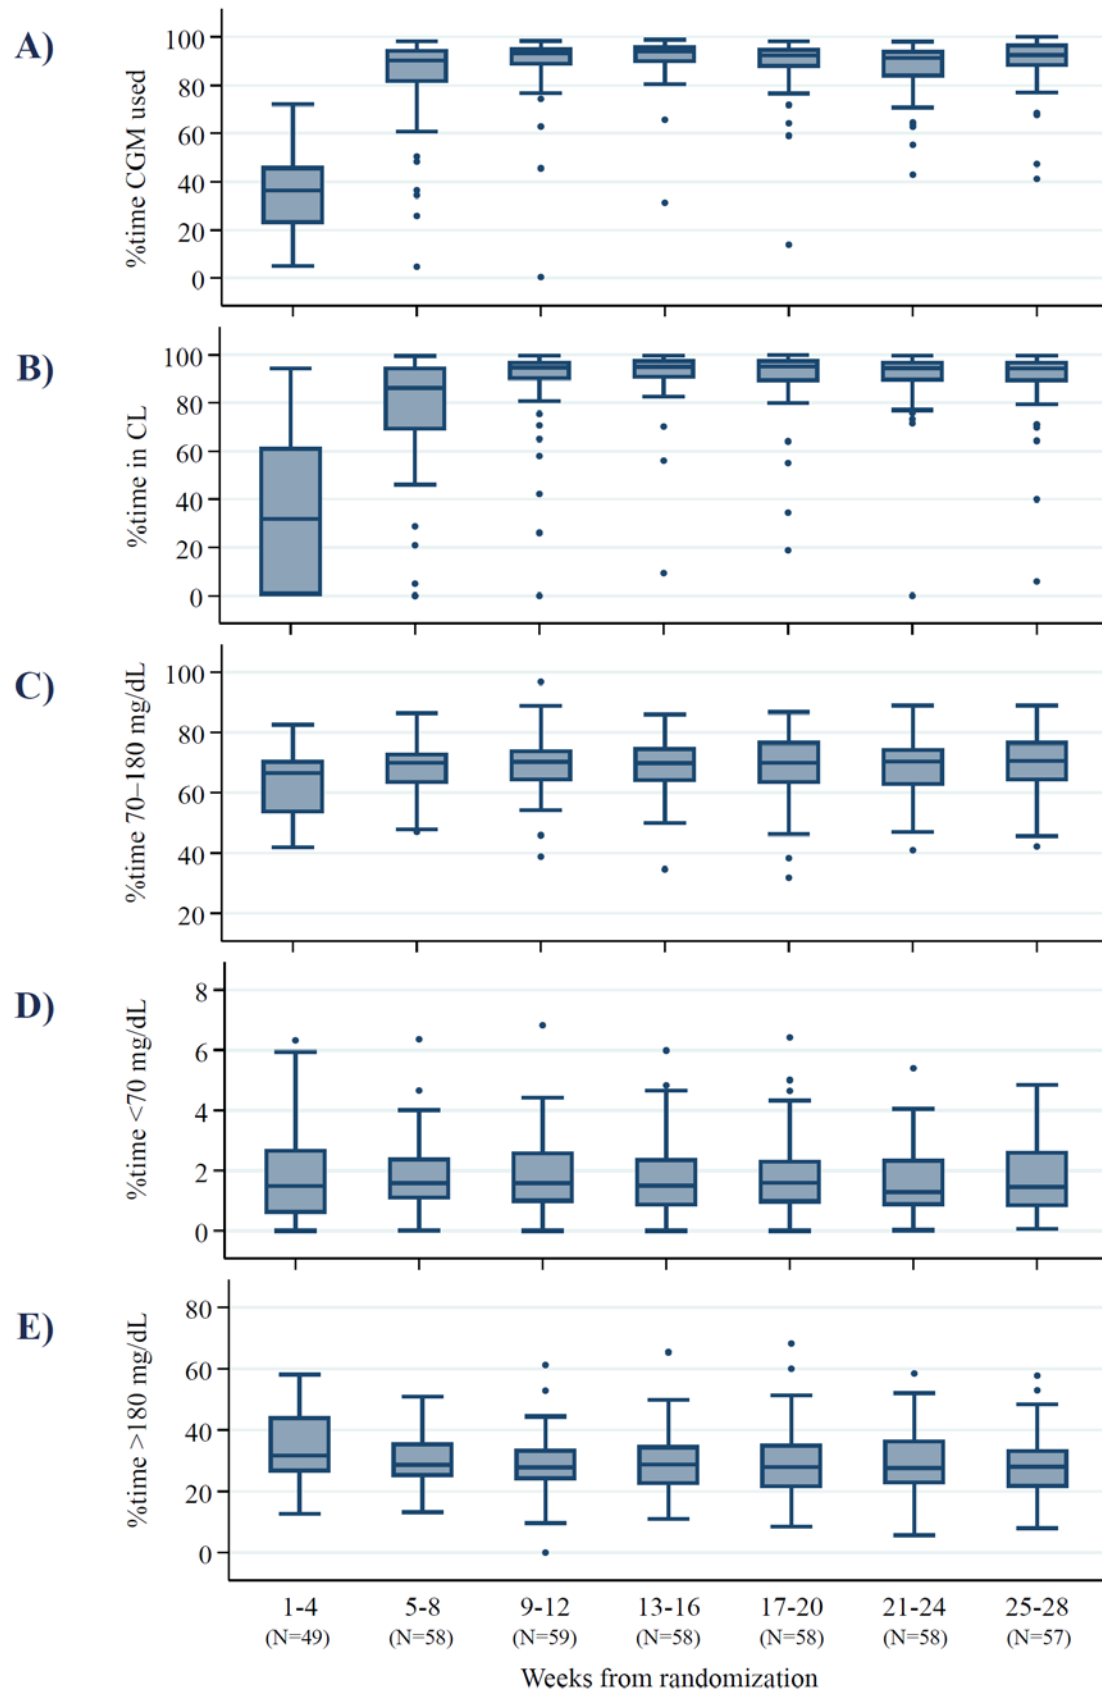

**Figure S4: Intervention group – device wear and continuous glucose monitoring (CGM) metrics.** Boxplots represent 4-week time blocks, starting from randomization. Glucose levels are expressed in mg/dL. CL, closed-loop.

**Table S1: Eligibility criteria**

|                                                                                                                                                                                                                                                                                                                                                                                                                                                                                                                                                                                                                                                                                                                                                                                                                                                                                                                                                                                                                                                                                                                                                                                                                                                                                                                                                                                                                                                                                                                               |
|-------------------------------------------------------------------------------------------------------------------------------------------------------------------------------------------------------------------------------------------------------------------------------------------------------------------------------------------------------------------------------------------------------------------------------------------------------------------------------------------------------------------------------------------------------------------------------------------------------------------------------------------------------------------------------------------------------------------------------------------------------------------------------------------------------------------------------------------------------------------------------------------------------------------------------------------------------------------------------------------------------------------------------------------------------------------------------------------------------------------------------------------------------------------------------------------------------------------------------------------------------------------------------------------------------------------------------------------------------------------------------------------------------------------------------------------------------------------------------------------------------------------------------|
| <p><b>Inclusion criteria</b></p> <p>An individual is eligible for inclusion in the study if ALL the following criteria are met:</p> <ol style="list-style-type: none"><li>1. Type 1 diabetes (diagnosis consistent with American Diabetes Association Classification of Diabetes Mellitus) for at least 1 year, with fasting C-peptide &lt;0.1 nmol/L (in the absence of hypoglycaemia)</li><li>2. Insulin regimen either:<ul style="list-style-type: none"><li>○ Multiple daily injections (MDI) with <math>\geq 4</math> injections per day (including <math>\geq 3</math> rapid-acting insulin injections and <math>\geq 1</math> long-acting insulin injection); or</li><li>○ Insulin pump therapy (CSII) established for <math>\geq 3</math> months</li></ul></li><li>3. Age 25–70 years inclusive at time of screening</li><li>4. <math>HbA_{1c} \leq 10.5\%</math></li><li>5. Living in an area with internet and cellular phone coverage</li><li>6. English speaking</li></ol>                                                                                                                                                                                                                                                                                                                                                                                                                                                                                                                                        |
| <p><b>Exclusion criteria</b></p> <p>An individual will be excluded from the study if ANY of the following criteria are met:</p> <ol style="list-style-type: none"><li>1. Chronic kidney disease (eGFR &lt;45mL/min/1.73m<sup>2</sup>)</li><li>2. Current use of real-time CGM (defined as real-time CGM use &gt;25% of the time for the past 3 months)</li><li>3. Use of any non-insulin glucose-lowering agent within the past 3 months</li><li>4. Oral or injected steroid use within the past 3 months</li><li>5. Pregnancy, or planned pregnancy within study period</li><li>6. Uncontrolled coeliac disease (not following a gluten free diet), or other untreated malabsorption</li><li>7. Uncontrolled thyroid disease</li><li>8. Clinically-significant gastroparesis</li><li>9. Uncontrolled hypertension (diastolic BP &gt;100 mmHg and/or systolic BP &gt;160 mmHg)</li><li>10. History of myocardial infarction, severe uncontrolled heart failure, unstable angina, transient ischaemic attack, stroke, or thromboembolic disease in the past 3 months</li><li>11. Poor visual acuity precluding use of the investigational technology</li><li>12. Inability or unwillingness to meet protocol requirements (such as carbohydrate-counting, frequency of blood glucose monitoring, CGM wear as per allocated study group only)</li><li>13. Severe or unstable medical or psychological condition which, in the opinion of the investigator, would compromise the ability to meet protocol requirements</li></ol> |

**Table S2: Missing data for study outcomes**

|                                     | <b>Overall missing</b> | <b>HCL group (MDI/Pump)<br/><i>n</i>=61 (30/31)</b> | <b>Control group (MDI/Pump)<br/><i>n</i>=59 (31/28)</b> |
|-------------------------------------|------------------------|-----------------------------------------------------|---------------------------------------------------------|
| CGM mid-study                       | 11                     | 4 (1/3)                                             | 7 (5/2)                                                 |
| CGM study-end                       | 20                     | 6 (3/3)                                             | 14 (9/5)                                                |
| HbA <sub>1c</sub> mid-study         | 8                      | 3 (0/3)                                             | 5 (4/1)                                                 |
| HbA <sub>1c</sub> study-end         | 9                      | 2 (1/1)                                             | 7 (5/2)                                                 |
| ICR mid-study                       | 11                     | 3 (0/3)                                             | 8 (5/3)                                                 |
| ICR study-end                       | 16                     | 3 (2/1)                                             | 13 (8/5)                                                |
| Weight mid-study                    | 14                     | 4 (0/4)                                             | 10 (5/5)                                                |
| Weight study-end                    | 12                     | 3 (2/1)                                             | 9 (4/5)                                                 |
| Total daily insulin mid-study       | 11                     | 3 (0/3)                                             | 8 (5/3)                                                 |
| Proportions daily insulin mid-study | 11                     | 3 (0/3)                                             | 8 (5/3)                                                 |
| Total daily insulin study-end       | 14                     | 3 (2/1)                                             | 11 (6/5)                                                |
| Proportions daily insulin study-end | 14                     | 3 (2/1)                                             | 11 (6/5)                                                |
| 1,5-anhydroglucitol study-end       | 10                     | 2 (1/1)                                             | 8 (5/3)                                                 |
| Psychosocial study-end              | 13                     | 3 (1/2)                                             | 10 (6/4)                                                |

MDI, multiple daily injections. CGM, continuous glucose monitoring. HCL, hybrid closed loop. ICR, insulin-to-carbohydrate ratio.

**Table S3: Glucose outcomes 24 hours/day at mid-study**

|                                | <b>HCL group<br/>(n=61)</b> | <b>Control group<br/>(n=59)</b> | <b>Difference HCL<br/>minus control</b> | <b>p value</b> |
|--------------------------------|-----------------------------|---------------------------------|-----------------------------------------|----------------|
| %time glucose 70–180 *         | 67.8 (10.9)                 | 54.9 (14.4)                     | 12.4 (8.5, 16.3)                        | <0.001         |
| %time glucose 70–140 *         | 44.3 (8.2)                  | 33.7 (12.1)                     | 9.1 (5.8, 12.4)                         | <0.001         |
| %time glucose <70 †            | 1.7 (1.0, 2.9)              | 4.0 (2.8, 6.0)                  | -2.2 (-2.8, -1.3)                       | <0.001         |
| %time glucose <59 †            | 0.5 (0.3, 1.2)              | 1.9 (0.6, 2.8)                  | -1.2 (-1.6, -0.6)                       | <0.001         |
| %time glucose <54 †            | 0.3 (0.1, 0.6)              | 1.0 (0.3, 1.9)                  | -0.7 (-1.0, -0.3)                       | <0.001         |
| %time glucose <50 †            | 0.2 (0.0, 0.5)              | 0.8 (0.2, 1.4)                  | -0.5 (-0.7, -0.2)                       | <0.001         |
| %time glucose >180 *           | 30.0 (11.2)                 | 39.9 (16.4)                     | -9.0 (-13.1, -4.9)                      | <0.001         |
| %time glucose >200 †           | 6.1 (4.5, 9.6)              | 15.3 (7.1, 18.9)                | -7.1 (-9.8, -3.8)                       | <0.001         |
| %time glucose >250 †           | 1.9 (0.6, 3.8)              | 4.9 (0.9, 7.1)                  | -2.0 (-3.5, -0.6)                       | 0.001          |
| Mean glucose *                 | 157 (14)                    | 171 (23)                        | -11 (-16, -4)                           | 0.003          |
| SD *                           | 54(11)                      | 67 (13)                         | -9.0 (-13, -5)                          | <0.001         |
| CV *                           | 34.7 (4.5)                  | 39.3 (5.3)                      | -3.2 (-5.0, -1.4)                       | 0.001          |
| HbA <sub>1c</sub> (%) *        | 7.0 (0.5)                   | 7.5 (0.8)                       | -0.4 (-0.6, -0.2)                       | <0.001         |
| HbA <sub>1c</sub> (mmol/mol) * | 53 (6)                      | 58 (9)                          | -4 (-7, -2)                             | <0.001         |

Glucose levels are expressed in mg/dL. HCL, hybrid closed loop.

\* Results presented as mean (SD), mean difference (95% CI), analysis using ANCOVA with adjustment for baseline value

† Results presented as median (IQR), median difference (95% CI), analysis using rank sum test.

**Table S4: Intervention group continuous glucose monitoring metrics, before and after the initial HCL activation**

|                                                   | Before closed-loop activation * | After closed-loop activation |                |                |                |                |                |
|---------------------------------------------------|---------------------------------|------------------------------|----------------|----------------|----------------|----------------|----------------|
|                                                   |                                 | Month 1                      | Month 2        | Month 3        | Month 4        | Month 5        | Month 6 †      |
| Number of participants ‡                          | 60                              | 60                           | 59             | 58             | 58             | 56             | 49             |
| % time glucose 70–180                             | 62 (49, 69)                     | 71 (64, 74)                  | 69 (65, 74)    | 70 (63, 76)    | 69 (63, 77)    | 71 (63, 76)    | 73 (65, 78)    |
| % time glucose 70–140                             | 34 (26, 43)                     | 42 (39, 49)                  | 43 (39, 47)    | 43 (39, 50)    | 43 (37, 52)    | 45 (37, 49)    | 46 (40, 52)    |
| % time glucose <70                                | 1.5 (0.7, 2.9)                  | 1.3 (0.9, 2.4)               | 1.6 (1.1, 2.5) | 1.4 (0.8, 2.4) | 1.5 (0.9, 2.5) | 1.4 (0.8, 2.6) | 1.4 (0.8, 3.0) |
| % time glucose <59                                | 0.3 (0.0, 0.8)                  | 0.4 (0.2, 0.7)               | 0.5 (0.2, 1.0) | 0.4 (0.2, 0.8) | 0.4 (0.2, 0.8) | 0.4 (0.2, 0.8) | 0.4 (0.2, 1.0) |
| % time glucose <54                                | 0.1 (0.0, 0.5)                  | 0.2 (0.1, 0.4)               | 0.3 (0.1, 0.6) | 0.2 (0.1, 0.5) | 0.2 (0.1, 0.5) | 0.2 (0.1, 0.4) | 0.2 (0.1, 0.5) |
| % time glucose <50                                | 0.1 (0.0, 0.2)                  | 0.1 (0.0, 0.2)               | 0.1 (0.0, 0.3) | 0.1 (0.0, 0.3) | 0.1 (0.0, 0.3) | 0.1 (0.0, 0.2) | 0.1 (0.0, 0.2) |
| % time glucose >180                               | 37 (28, 49)                     | 28 (23, 35)                  | 29 (23, 33)    | 28 (21, 36)    | 29 (20, 35)    | 27 (21, 36)    | 25 (19, 33)    |
| % time glucose >250                               | 9 (5, 15)                       | 6 (4, 9)                     | 6 (4, 9)       | 6 (4, 10)      | 6 (3, 10)      | 6 (3, 9)       | 6 (3, 8)       |
| Mean glucose                                      | 165 (157, 180)                  | 157 (150, 165)               | 156 (150, 164) | 157 (147, 168) | 156 (146, 168) | 154 (147, 166) | 151 (145, 164) |
| Glucose SD                                        | 56 (50, 64)                     | 52 (48, 60)                  | 54 (48, 58)    | 54 (47, 59)    | 54 (47, 58)    | 53 (47, 57)    | 51 (45, 59)    |
| Glucose CV                                        | 34 (31, 38)                     | 34 (32, 36)                  | 34 (32, 36)    | 34 (32, 36)    | 34 (31, 37)    | 34 (31, 35)    | 33 (31, 36)    |
| % time in closed-loop when using CGM              | 0.0 (0.0, 0.0)                  | 95 (92, 98)                  | 95 (91, 98)    | 95 (89, 98)    | 94 (88, 99)    | 94 (87, 98)    | 94 (89, 97)    |
| % time in closed-loop as proportion of total time | 0.0 (0.0, 0.0)                  | 88 (82, 92)                  | 87 (80, 92)    | 88 (78, 92)    | 85 (74, 91)    | 85 (74, 91)    | 84 (78, 89)    |
| CGM use (%)                                       | 39 (26, 67) §                   | 94 (90, 97)                  | 93 (87, 95)    | 93 (88, 95)    | 91 (84, 95)    | 94 (84, 97)    | 91 (86, 93)    |

Results presented as median (IQR). Glucose level are expressed in mg/dL. CGM, continuous glucose monitoring.

\* Median duration of this period: 17.5 days (IQR: 10.5, 28).

† Trial duration was 26 weeks post randomization, irrespective of time to closed-loop activation. Some participants had longer duration due to insufficient masked CGM readings

‡ One participant was excluded from analysis due to withdrawal prior to closed loop activation

§ CGM use between date of randomization and HCL activation.
