# Supplementary material
Source: publisher figshare collection journal article supplement (https://diabetesjournals.figshare.com/articles/dataset/_/13014374)
Supplement: Supplementary file 2 [file 1]

## APPENDIX

The Australian JDRF Closed-Loop Research Group members have had input into the study and are named as follows:

Adult Clinical Sites: David N O’Neal (CI), Sybil A McAuley, Melissa H Lee, Barbora Paldus, Catriona M Sims, Richard J MacIsaac, Glenn M Ward (*St Vincent’s Hospital Melbourne*); Peter G Colman (*Royal Melbourne Hospital*); Neale D Cohen (*Baker Heart and Diabetes Institute*); Leon A Bach, Kavita Kumareswaran (*The Alfred*); Stephen N Stranks, Morton G Burt (*Flinders Medical Centre*); D Jane Holmes-Walker (*Westmead Hospital*); Roland W McCallum (*Royal Hobart Hospital*); Joey Kaye (*Sir Charles Gairdner Hospital*).

Psychological and Cognitive Group: Jane Speight, Christel Hendrieckx, Jennifer Halliday, Sienna Russell-Green (*Australian Centre for Behavioural Research in Diabetes: Diabetes Victoria and Deakin University*); Steven Trawley (*Cairnmillar Institute*).

Data and Biobanking Coordination: Alicia J Jenkins, Andrzej Januszewski, Anthony C Keech (University of Sydney)

Statistical Analyses: Sara Vogrin, Vijaya Sundararajan (*University of Melbourne*); Hanafi Mohammed Husin (*Australian Centre for Behavioural Research in Diabetes: Diabetes Victoria and Deakin University*)

Health Economics: Philip M Clarke (*University of Melbourne*)

Paediatric Study Group: Timothy W Jones, Elizabeth A Davis, Martin I de Bock, Mary B Abraham (*Princess Margaret Hospital for Children*); Geoff R Ambler (*The Children’s Hospital at Westmead*); Fergus J Cameron (*Royal Children’s Hospital Melbourne*); Jan M Fairchild (*Women’s and Children’s Hospital, Adelaide*); Bruce R King (*John Hunter Children’s Hospital*).
